# Supplementary material for: Assessment of Plant Sterols in the Diet of Adult Polish Population with the Use of a Newly Developed Database
Source: MDPI journal article supplement (doi:10.3390/nu13082722), 2021-08-07
Supplement: s1 [file s1]

**Table S1: Content of selected plant sterols (stigmasterol, campesterol, beta-sitosterol) and total plant sterols in food products (mg/100g of product) <sup>1)</sup>.**

| No. | Food products                                        | Code   | Stigmasterol<br>mg/100g | Campesterol<br>mg/100g | Beta-sitosterol<br>mg/100g | Plant sterols<br>total<br>mg/100g | Retention<br>factor |
|-----|------------------------------------------------------|--------|-------------------------|------------------------|----------------------------|-----------------------------------|---------------------|
| 1   | Yogurt with bananas, 1,5% fat                        | 131002 | 0.09                    | 0.075                  | 0.55                       | 0.715                             | 1                   |
| 2   | Yogurt with bilberries, 1,5% fat                     | 131003 | 0                       | 0.05                   | 1.11                       | 1.32                              | 1                   |
| 3   | Yogurt with apricots, 1,5% fat                       | 131004 | 0.02                    | 0.06                   | 0.58                       | 0.67                              | 1                   |
| 4   | Yogurt with strawberries, 1,5% fat                   | 131005 | 0.01                    | 0.015                  | 0.545                      | 0.59                              | 1                   |
| 5   | Yogurt with cherries, 1,5% fat                       | 131006 | 0                       | 0.01                   | 0.55                       | 0.565                             | 1                   |
| 6   | Fresh cheese dessert, with cocoa                     | 142001 | 0.628                   | 0.246                  | 1.552                      | 2.52                              | 1                   |
| 7   | Fresh cheese dessert, with strawberries              | 142002 | 0.02                    | 0.03                   | 1.09                       | 1.18                              | 1                   |
| 8   | Cheese fresh, with strawberries, homogenized         | 142009 | 0.02                    | 0.03                   | 1.09                       | 1.18                              | 1                   |
| 9   | Ice cream, fruit                                     | 151001 | 0.02                    | 0.03                   | 1.09                       | 1.18                              | 1                   |
| 10  | Milk dessert, with rice and apples                   | 161001 | 0.21                    | 0.216                  | 2.13                       | 2.64                              | 1                   |
| 11  | Fish-vegetable salad "Paprykarz szczeciński", canned | 431001 | 2.547                   | 10.202                 | 17.66                      | 33.29                             | 1                   |
| 12  | Cod salad, canned                                    | 431004 | 2.147                   | 9.842                  | 16                         | 30.61                             | 1                   |
| 13  | Mackerel salad, canned                               | 431005 | 2.147                   | 9.842                  | 16                         | 30.61                             | 1                   |
| 14  | Sardine in tomato sauce, canned                      | 431007 | 0.85                    | 0.14                   | 1.2                        | 2.35                              | 1                   |
| 15  | Herring in tomato sauce, canned                      | 431010 | 0.85                    | 0.14                   | 1.2                        | 2.35                              | 1                   |
| 16  | Oil, safflower                                       | 511001 | 23                      | 36                     | 168                        | 274                               | 1                   |
| 17  | Oil, corn                                            | 511002 | 55.3                    | 153                    | 538                        | 746.3                             | 1                   |
| 18  | Oil, palm                                            | 511003 | 8.4                     | 15.7                   | 38.5                       | 62.6                              | 1                   |
| 19  | Oil, rapeseed, low erucic acid content               | 511004 | 2.38                    | 260                    | 368                        | 630.38                            | 1                   |
| 20  | Oil, rapeseed "Uniwersalny"                          | 511005 | 2.38                    | 260                    | 368                        | 630.38                            | 1                   |
| 21  | Oil, rapeseed, cold pressed                          | 511006 | 2.38                    | 260                    | 368                        | 630.38                            | 1                   |
| 22  | Oil, rapeseed and soybean                            | 511007 | 28.89                   | 159                    | 260.5                      | 448.4                             | 1                   |
| 23  | Oil, sesame                                          | 511008 | 86.89                   | 90.3                   | 322.76                     | 499.95                            | 1                   |
| 24  | Oil, sunflower                                       | 511009 | 34.5                    | 31.5                   | 210                        | 290                               | 1                   |
| 25  | Oil, soybean                                         | 511010 | 55.4                    | 58                     | 153                        | 266.4                             | 1                   |
| 26  | Oil, wheatgerm                                       | 511011 | 0                       | 122                    | 370                        | 525                               | 1                   |
| 27  | Oil, olive                                           | 511012 | 1.02                    | 5.68                   | 126                        | 132.7                             | 1                   |
| 28  | "Planta", vegetable fat                              | 511013 | 25                      | 147                    | 243                        | 425                               | 1                   |
| 29  | Oil, grapeseed                                       | 511014 | 15                      | 13                     | 98                         | 126                               | 1                   |

|    |                                                   |        |     |     |      |      |      |
|----|---------------------------------------------------|--------|-----|-----|------|------|------|
| 30 | Margarine, hard, 80% fat                          | 512015 | 35  | 75  | 275  | 385  | 1    |
| 31 | Margarine, soft, 80% fat                          | 512016 | 35  | 75  | 275  | 385  | 1    |
| 32 | Margarine, soft, 70% fat                          | 512017 | 25  | 31  | 81   | 137  | 1    |
| 33 | Margarine, soft, 60% fat                          | 512018 | 25  | 28  | 74   | 127  | 1    |
| 34 | Margarine, soft, 50% fat                          | 512019 | 25  | 28  | 74   | 127  | 1    |
| 35 | Margarine, soft, 45% fat                          | 512020 | 25  | 28  | 74   | 127  | 1    |
| 36 | Butter, "Extra"                                   | 521001 | 0   | 0   | 4    | 4    | 1    |
| 37 | Butter, ordinary                                  | 521002 | 0   | 0   | 4    | 4    | 1    |
| 38 | Mixed fat, vegetable and animal, 60% fat          | 531004 | 25  | 28  | 74   | 127  | 1    |
| 39 | Wheat flour, type 500                             | 611001 | 0.4 | 6.5 | 21   | 31.8 | 0.62 |
| 40 | Wheat flour, type 550                             | 611003 | 0.4 | 6.5 | 21   | 31.8 | 0.62 |
| 41 | Wheat, grain                                      | 611014 | 0.8 | 5.1 | 17.4 | 32   | 0.62 |
| 42 | Buckwheat groats                                  | 621001 | 2.6 | 11  | 81   | 94.6 | 0.62 |
| 43 | Millet groats                                     | 621002 | 3.9 | 9.9 | 39   | 55   | 0.62 |
| 44 | Pearl flour                                       | 621003 | 1   | 1   | 6    | 9.7  | 0.62 |
| 45 | Wheat grits                                       | 621005 | 0.8 | 5.1 | 17.4 | 32   | 0.62 |
| 46 | Rice white polished                               | 621006 | 2   | 1.8 | 8.3  | 13.4 | 0.62 |
| 47 | Pasta made without eggs                           | 631001 | 0.2 | 0.5 | 4.6  | 7.1  | 0.62 |
| 48 | Rye bread from whole grain                        | 641001 | 2.9 | 17  | 47   | 86   | 1    |
| 49 | Rye bread                                         | 641002 | 2.2 | 11  | 29   | 51   | 1    |
| 50 | Rye bread "Pytlowy"                               | 641004 | 2.2 | 11  | 28   | 51   | 1    |
| 51 | Rye brown bread                                   | 641005 | 2.2 | 11  | 28   | 51   | 1    |
| 52 | Rye brown bread Litewski"                         | 641006 | 2.2 | 11  | 28   | 51   | 1    |
| 53 | Rye brown bread with honey                        | 641007 | 2.2 | 11  | 28   | 51   | 1    |
| 54 | Rye brown bread "Wytrawny"                        | 641008 | 2.2 | 11  | 28   | 51   | 1    |
| 55 | Rye brown bread with soybeans and sunflower seeds | 641009 | 2.2 | 11  | 28   | 51   | 1    |
| 56 | Rye bread "Sitkowy"                               | 641010 | 2.2 | 11  | 28   | 51   | 1    |
| 57 | Rye bread "Staropolski"                           | 641012 | 2.2 | 11  | 28   | 51   | 1    |
| 58 | Rye bread "Wileński"                              | 641013 | 2.2 | 11  | 28   | 51   | 1    |
| 59 | Rye bread "Pumpernickel"                          | 641014 | 2.9 | 17  | 47   | 86   | 1    |
| 60 | Rye bread with dried plums                        | 641015 | 2.2 | 11  | 28   | 51   | 1    |
| 61 | Rye bread, extruded                               | 641016 | 2.2 | 11  | 28   | 51   | 1    |
| 62 | Wheat-rye bread "Baltonowski"                     | 642001 | 1.8 | 11  | 30   | 54   | 1    |
| 63 | Crispbread                                        | 642002 | 2.9 | 17  | 47   | 86   | 1    |
| 64 | Wheat-rye bread "Mazowiecki"                      | 642003 | 1.8 | 11  | 30   | 54   | 1    |

|    |                                         |        |     |     |    |    |   |
|----|-----------------------------------------|--------|-----|-----|----|----|---|
| 65 | Wheat-rye bread with sunflower seeds    | 642004 | 1.8 | 11  | 30 | 54 | 1 |
| 66 | Wheat-rye bread with soya beans         | 642005 | 1.8 | 11  | 30 | 54 | 1 |
| 67 | Wheat-rye bread with milk               | 642006 | 1.8 | 11  | 30 | 54 | 1 |
| 68 | Wheat-rye bread "Poleski"               | 642008 | 2.2 | 11  | 28 | 51 | 1 |
| 69 | Wheat-rye bread "Wiejski"               | 642010 | 1.8 | 11  | 30 | 54 | 1 |
| 70 | Wheat-rye bread "Zwykły"                | 642013 | 1.8 | 11  | 30 | 54 | 1 |
| 71 | Wheat-rye bread "Beskidzki"             | 642014 | 2.2 | 11  | 28 | 51 | 1 |
| 72 | Wheat-rye bread with dried fruits mixed | 642015 | 2.2 | 11  | 28 | 51 | 1 |
| 73 | Wheat-rye bread with rolled oat         | 642016 | 2.2 | 11  | 28 | 51 | 1 |
| 74 | Wheat-rye bread with grains             | 642017 | 2.2 | 11  | 28 | 51 | 1 |
| 75 | Wheat rolls with onion                  | 642020 | 2.2 | 11  | 28 | 51 | 1 |
| 76 | Rolls, French                           | 643001 | 0.9 | 12  | 31 | 50 | 1 |
| 77 | Rolls, graham                           | 643002 | 2.2 | 11  | 28 | 51 | 1 |
| 78 | Wheat rolls                             | 643003 | 1.8 | 11  | 30 | 54 | 1 |
| 79 | Bread crumbs                            | 643004 | 1.2 | 16  | 35 | 56 | 1 |
| 80 | Wheat bread, graham                     | 643005 | 2.2 | 11  | 28 | 51 | 1 |
| 81 | Wheat bread                             | 643006 | 1.8 | 11  | 30 | 54 | 1 |
| 82 | Wheat bread with wheat grains           | 643007 | 1.8 | 11  | 30 | 54 | 1 |
| 83 | Wheat bread, extruded                   | 643008 | 1.8 | 11  | 30 | 54 | 1 |
| 84 | Wheat rolls for hot dog                 | 644001 | 1.8 | 11  | 30 | 54 | 1 |
| 85 | Wheat rolls with milk                   | 644002 | 0.6 | 6.8 | 18 | 29 | 1 |
| 86 | Wheat rolls with rolled oats            | 644003 | 1.8 | 11  | 30 | 54 | 1 |
| 87 | Wheat rolls with soya flour             | 644004 | 1.8 | 11  | 30 | 54 | 1 |
| 88 | Wheat rolls "Wrocławskie"               | 644005 | 1.8 | 11  | 30 | 54 | 1 |
| 89 | Wheat rolls "Kajzerki"                  | 644006 | 1.8 | 11  | 30 | 54 | 1 |
| 90 | Wheat toasted bread                     | 644007 | 1.8 | 11  | 30 | 54 | 1 |
| 91 | Wheat rolls "Strucla Wrocławska"        | 644008 | 1.8 | 11  | 30 | 54 | 1 |
| 92 | Wheat-graham toasted bread              | 644009 | 1.8 | 11  | 30 | 54 | 1 |
| 93 | Wheat rolls "Ciabata"                   | 644010 | 1.8 | 11  | 30 | 54 | 1 |
| 94 | Wheat rolls with whey                   | 644011 | 1.8 | 11  | 30 | 54 | 1 |
| 95 | Wheat rolls "Szwed"                     | 644013 | 1.8 | 11  | 30 | 54 | 1 |
| 96 | Sweet yeast buns                        | 645001 | 0.6 | 6.8 | 18 | 29 | 1 |
| 97 | Sweet yeast buns "Chąłki"               | 645002 | 0.6 | 6.8 | 18 | 29 | 1 |
| 98 | Semi-puff pastry with jam               | 645003 | 0.6 | 6.8 | 18 | 29 | 1 |
| 99 | Rolls, crescent                         | 645005 | 0.6 | 6.8 | 18 | 29 | 1 |

|     |                                                                   |        |       |      |       |        |      |
|-----|-------------------------------------------------------------------|--------|-------|------|-------|--------|------|
| 100 | Rolls yeast with fresh cheese                                     | 645006 | 0.6   | 6.8  | 18    | 29     | 1    |
| 101 | Rolls yeast with poppy seeds                                      | 645007 | 0.6   | 6.8  | 18    | 29     | 1    |
| 102 | Rolls yeast with plum jam                                         | 645008 | 0.6   | 6.8  | 18    | 29     | 1    |
| 103 | Corn crisps                                                       | 651001 | 21    | 51   | 148   | 276    | 1    |
| 104 | Muesli with dried fruit                                           | 651002 | 0.9   | 3.8  | 21.3  | 29.7   | 1    |
| 105 | Muesli with raisins and nuts                                      | 651003 | 6.5   | 6.4  | 21.3  | 40.7   | 1    |
| 106 | Wheat, bran                                                       | 651004 | 5.1   | 20.2 | 56.6  | 115.4  | 1    |
| 107 | Barley flakes                                                     | 651005 | 1     | 1    | 6     | 9.7    | 0.62 |
| 108 | Corn flakes                                                       | 651006 | 1     | 4.3  | 17    | 26     | 1    |
| 109 | Corn flakes fortified with vitamins and iron                      | 651007 | 1     | 4.3  | 17    | 26     | 1    |
| 110 | Rolled oats                                                       | 651008 | 1.6   | 5.5  | 32    | 39.1   | 0.62 |
| 111 | Wheat flakes                                                      | 651009 | 1     | 1    | 6     | 9.7    | 0.62 |
| 112 | Rye flakes                                                        | 651010 | 1     | 1    | 6     | 9.7    | 0.62 |
| 113 | Rice puffed, roasted                                              | 651011 | 0.6   | 0.1  | 2     | 2.8    | 1    |
| 114 | Wheat, germs                                                      | 651012 | 3.2   | 94   | 230   | 344    | 1    |
| 115 | Corn flakes with sugar, fortified with vitamins and iron          | 651013 | 0.3   | 0.2  | 4     | 5.8    | 1    |
| 116 | Corn flakes with honey and nuts, fortified with vitamins and iron | 651014 | 0.3   | 0.2  | 4     | 5.8    | 1    |
| 117 | Pastry with meat                                                  | 661001 | 0.6   | 6.8  | 18    | 29     | 1    |
| 118 | Pizza with meat and herbs                                         | 661002 | 0     | 7.3  | 14.9  | 23.2   | 1    |
| 119 | Pizza with mushrooms and onion                                    | 661003 | 0     | 7.3  | 14.9  | 23.2   | 1    |
| 120 | Aubergine                                                         | 711001 | 0.6   | 0.2  | 2     | 2.9    | 2.36 |
| 121 | Beets greens                                                      | 711002 | 0     | 0    | 0     | 21     | 0.59 |
| 122 | Broad beans                                                       | 711003 | 8.1   | 10.2 | 24.4  | 145    | 0.95 |
| 123 | Broccoli, green                                                   | 711004 | 1.1   | 6.9  | 31    | 39     | 0.57 |
| 124 | Brussels sprouts                                                  | 711005 | 0.38  | 8    | 34    | 43     | 0.61 |
| 125 | Beetroot                                                          | 711006 | 5.7   | 0.6  | 9.1   | 17.1   | 0.59 |
| 126 | Onion                                                             | 711007 | 0.57  | 0.82 | 7     | 8.4    | 0.53 |
| 127 | Horseradish                                                       | 711008 | 0.26  | 3.3  | 14    | 17.56  | 0.59 |
| 128 | Squash-summer                                                     | 711009 | 8.4   | 0.4  | 7.3   | 16.7   | 0.65 |
| 129 | Chicory                                                           | 711010 | 7.9   | 3.3  | 16.7  | 30.9   | 0.87 |
| 130 | Garlic, raw                                                       | 711011 | 0.5   | 2    | 8.7   | 11.2   | 0.53 |
| 131 | Pumpkin                                                           | 711012 | 8.4   | 0.4  | 7.3   | 16.7   | 0.42 |
| 132 | Beans, white, dried                                               | 711013 | 86.2  | 15.2 | 85.1  | 186.5  | 0.54 |
| 133 | String-beans, raw                                                 | 711015 | 11.12 | 1.96 | 10.98 | 24.06  | 0.95 |
| 134 | Peas, yellow, dried                                               | 711016 | 26    | 36.4 | 269.1 | 349.05 | 0.54 |

|     |                                       |        |      |       |       |       |      |
|-----|---------------------------------------|--------|------|-------|-------|-------|------|
| 135 | Peas, green, raw                      | 711017 | 4    | 5.6   | 41.4  | 53.7  | 0.48 |
| 136 | Cauliflower                           | 711019 | 3.7  | 9.5   | 26    | 40    | 0.63 |
| 137 | Kohlrabi                              | 711020 | 0.2  | 2.8   | 9.4   | 13    | 0.59 |
| 138 | Cabbage, white                        | 711021 | 0.2  | 2.8   | 9.4   | 13    | 0.57 |
| 139 | Cabbage, red                          | 711022 | 0.2  | 2.8   | 9.4   | 13    | 0.57 |
| 140 | Cabbage, Shantung                     | 711023 | 0.03 | 1.6   | 6.8   | 8.5   | 0.57 |
| 141 | Dill                                  | 711025 | 13.3 | 1.6   | 15.5  | 32.5  | 1    |
| 142 | Sweetcorn                             | 711026 | 0.4  | 9.1   | 34.1  | 43.6  | 1    |
| 143 | Carrot                                | 711027 | 2.8  | 2.2   | 11    | 16    | 0.59 |
| 144 | Cucumber                              | 711028 | 2.9  | 0.2   | 3.8   | 7.3   | 1.01 |
| 145 | Pepper, red                           | 711029 | 0.2  | 4.2   | 16.4  | 22    | 1.01 |
| 146 | Pepper, green                         | 711030 | 0.33 | 2     | 4.9   | 7.23  | 0.91 |
| 147 | Parsley, root                         | 711032 | 11.5 | 1.2   | 13.6  | 28.8  | 0.59 |
| 148 | Parsley, leaves                       | 711033 | 13.3 | 1.6   | 15.5  | 32.5  | 0.87 |
| 149 | Tomato                                | 711034 | 1.7  | 0.28  | 2.4   | 4.7   | 0.88 |
| 150 | Leek                                  | 711035 | 0.06 | 0.61  | 7.3   | 8.1   | 0.32 |
| 151 | Turnip                                | 711037 | 0.26 | 3.3   | 14    | 17.56 | 0.62 |
| 152 | Radishes                              | 711038 | 0    | 0     | 4.4   | 9     | 0.59 |
| 153 | Lettuce                               | 711039 | 7.9  | 3.3   | 16.7  | 30.9  | 0.87 |
| 154 | Celeriac                              | 711040 | 8.6  | 2.7   | 8.9   | 20.2  | 0.59 |
| 155 | Celery                                | 711041 | 7    | 2.7   | 8.9   | 20    | 1    |
| 156 | Lentils red, dried                    | 711042 | 4    | 6     | 47    | 57    | 0.54 |
| 157 | Lentil sprouts, raw                   | 711043 | 2    | 3     | 23.5  | 28.5  | 1    |
| 158 | Soya bean, dried                      | 711044 | 16.3 | 20.94 | 64.98 | 161   | 0.54 |
| 159 | Soya bean sprouts, raw                | 711045 | 5.4  | 1.8   | 7.5   | 15.2  | 1    |
| 160 | Chives                                | 711047 | 0    | 5.1   | 16.2  | 22    | 0.87 |
| 161 | Asparagus, raw                        | 711048 | 3.7  | 9.5   | 26    | 40    | 1.31 |
| 162 | Spinach                               | 711049 | 2.9  | 0.8   | 5.4   | 10.6  | 0.87 |
| 163 | Potato                                | 711052 | 0.38 | 0.23  | 2.7   | 3.8   | 0.69 |
| 164 | Peas green, frozen                    | 721005 | 4    | 5.6   | 41.4  | 53.7  | 0.95 |
| 165 | Carrot, frozen                        | 721007 | 2.8  | 2.2   | 11    | 16    | 1    |
| 166 | Tomato, frozen                        | 721009 | 1.7  | 0.28  | 2.4   | 4.7   | 0.88 |
| 167 | Spinach, frozen                       | 721010 | 2.9  | 0.8   | 5.4   | 10.6  | 0.87 |
| 168 | Sweetcorn, frozen                     | 721019 | 0.4  | 9.1   | 34.1  | 43.6  | 1    |
| 169 | Soup, beetroot and vegetables, frozen | 722001 | 5.7  | 0.6   | 9.1   | 17.1  | 1    |

|     |                                                            |        |        |        |         |         |      |
|-----|------------------------------------------------------------|--------|--------|--------|---------|---------|------|
| 170 | Spring vegetables, frozen                                  | 722002 | 5.524  | 5.798  | 20.814  | 32.591  | 1    |
| 171 | Vegetables with pasta, frozen                              | 722003 | 2.862  | 3.149  | 12.707  | 19.845  | 1    |
| 172 | Vegetables with rice, frozen                               | 722004 | 3.762  | 3.799  | 14.557  | 22.995  | 1    |
| 173 | Vegetable salad "Paprykarz", frozen                        | 722007 | 3.7005 | 1.087  | 6.568   | 11.816  | 1    |
| 174 | Vegetable salad with sweetcorn, frozen                     | 722008 | 4.21   | 4.21   | 21.75   | 30.74   | 1    |
| 175 | Mexican salad, frozen                                      | 722009 | 4.21   | 4.21   | 21.75   | 30.74   | 1    |
| 176 | Scandinavian salad, frozen                                 | 722010 | 3.7005 | 1.087  | 6.568   | 11.816  | 1    |
| 177 | Vegetables-mix, frozen                                     | 722011 | 5.716  | 1.791  | 11.16   | 19.45   | 1    |
| 178 | Soup "Wintry", frozen                                      | 722016 | 5.524  | 5.798  | 20.814  | 32.591  | 1    |
| 179 | Vegetable salad, frozen                                    | 722022 | 4.21   | 4.21   | 21.75   | 30.74   | 1    |
| 180 | Vegetable with chicken and rice, frozen                    | 722023 | 2.8096 | 2.8592 | 10.8156 | 17.0564 | 1    |
| 181 | Vegetables with spices, frozen                             | 722024 | 3.7005 | 1.087  | 6.568   | 11.816  | 1    |
| 182 | Vegetables with chicken and pasta, frozen                  | 722026 | 2.2696 | 2.4692 | 9.7056  | 15.1664 | 1    |
| 183 | Vegetables with potatoes and ham cooked and smoked, frozen | 722028 | 2.3236 | 2.3882 | 9.1356  | 14.1764 | 1    |
| 184 | Vegetables with pasta and ham cooked and smoked, frozen    | 722029 | 2.2696 | 2.4692 | 9.7056  | 15.1664 | 1    |
| 185 | String-beans, drained, canned                              | 731001 | 11.12  | 1.96   | 10.98   | 24.06   | 0.95 |
| 186 | Beans, white, canned                                       | 731002 | 11.12  | 1.96   | 10.98   | 24.06   | 0.95 |
| 187 | Peas, green, drained, canned                               | 731003 | 4      | 5.6    | 41.4    | 53.7    | 0.95 |
| 188 | Sauerkraut                                                 | 731004 | 0.09   | 3.2    | 11      | 15      | 0.41 |
| 189 | Tomato, paste, canned                                      | 731005 | 8.5    | 1.4    | 12      | 23.5    | 1    |
| 190 | Soya flour, whole fat                                      | 731006 | 16.3   | 20.94  | 64.98   | 161     | 0.54 |
| 191 | Cucumber, pickled with salt and dill                       | 731007 | 2.9    | 0.2    | 3.8     | 7.3     | 1.01 |
| 192 | pepper red, pickled, canned                                | 731008 | 0.33   | 2      | 4.9     | 7.23    | 1    |
| 193 | Tomato, ketchup                                            | 731010 | 8.5    | 1.4    | 12      | 23.5    | 1    |
| 194 | Sweetcorn, canned                                          | 731012 | 0.4    | 9.1    | 34.1    | 43.6    | 1    |
| 195 | Polish dill pickles, canned                                | 731013 | 2.9    | 0.2    | 3.8     | 7.3     | 1    |
| 196 | Polish dill pickles with red pepper, canned                | 731014 | 2.9    | 0.2    | 3.8     | 7.3     | 1    |
| 197 | Polish dill pickles "Pikle", canned                        | 731015 | 2.9    | 0.2    | 3.8     | 7.3     | 1    |
| 198 | Onion pickled, canned                                      | 731016 | 0.57   | 0.82   | 7       | 8.4     | 1    |
| 199 | Swedish cucumbers, canned                                  | 731018 | 3.7005 | 1.087  | 6.568   | 11.816  | 1    |
| 200 | Mushroom, common, row                                      | 741001 | 0      | 2      | 0       | 2       | 1    |
| 201 | Mushroom common pickled, canned                            | 743001 | 0      | 2      | 0       | 2       | 1    |
| 202 | Gooseberries                                               | 811001 | 0.2    | 0.2    | 5.6     | 6       | 1.01 |
| 203 | Pineapple                                                  | 811002 | 0.44   | 3.8    | 11      | 17      | 1.01 |
| 204 | Water-melon                                                | 811003 | 0.26   | 0.18   | 0.91    | 1.35    | 1.01 |

|     |                                      |        |      |      |       |        |      |
|-----|--------------------------------------|--------|------|------|-------|--------|------|
| 205 | Avocado                              | 811004 | 2    | 5    | 76    | 83     | 1.01 |
| 206 | Banana                               | 811005 | 1.8  | 1.5  | 11    | 14.3   | 1.01 |
| 207 | Peach                                | 811006 | 1.8  | 0.58 | 13    | 15.38  | 1.01 |
| 208 | Lemon                                | 811007 | 1.3  | 3.3  | 13    | 18     | 1.01 |
| 209 | Bilberries                           | 811008 | 0    | 1    | 22.2  | 26.4   | 1.01 |
| 210 | Sweet cherries                       | 811009 | 0    | 0.2  | 11    | 11.3   | 1.01 |
| 211 | Grapefruit                           | 811010 | 1    | 2.5  | 15    | 18.5   | 1.01 |
| 212 | Pears                                | 811011 | 0    | 0.27 | 12    | 12.27  | 1.01 |
| 213 | Guava                                | 811012 | 1.5  | 2.7  | 19.4  | 24.4   | 1.01 |
| 214 | Apple                                | 811013 | 0.1  | 0.36 | 13    | 13.46  | 1.01 |
| 215 | Kiwi fruit                           | 811014 | 1.4  | 0.44 | 7.2   | 9.1    | 1.01 |
| 216 | Raspberries                          | 811015 | 0    | 0.9  | 23.3  | 27.4   | 1.01 |
| 217 | Mandarin orange                      | 811016 | 0.78 | 4    | 12    | 16.78  | 1.01 |
| 218 | Mango                                | 811017 | 1.5  | 2.7  | 19.4  | 24.4   | 1.01 |
| 219 | Melon                                | 811018 | 0.49 | 0.17 | 1.2   | 1.86   | 1.01 |
| 220 | Apricots                             | 811019 | 0.4  | 1.2  | 11.6  | 13.4   | 1.01 |
| 221 | Nectarine                            | 811020 | 1.8  | 0.58 | 13    | 15.38  | 1.01 |
| 222 | Orange                               | 811022 | 1    | 3    | 20    | 24     | 1.01 |
| 223 | Whitecurrants                        | 811023 | 0.2  | 0.2  | 5.6   | 6      | 1.01 |
| 224 | Blackcurrants                        | 811024 | 0    | 0.5  | 8.1   | 8.8    | 1.01 |
| 225 | Redcurrants                          | 811025 | 0.2  | 0.2  | 5.6   | 6      | 1.01 |
| 226 | Wild strawberries                    | 811026 | 0.2  | 0.3  | 10.9  | 11.8   | 1.01 |
| 227 | Plums                                | 811027 | 0.7  | 1.1  | 10.6  | 13     | 1.01 |
| 228 | Strawberries                         | 811028 | 0.2  | 0.3  | 10.9  | 11.8   | 1.01 |
| 229 | Grapes                               | 811029 | 0.2  | 1.2  | 12.3  | 14.8   | 1.01 |
| 230 | Sour cherries                        | 811030 | 0    | 0.2  | 11    | 11.3   | 1.01 |
| 231 | Raspberries, frozen                  | 821002 | 0    | 0.9  | 23.3  | 27.4   | 1    |
| 232 | Plums without stones, frozen         | 821004 | 0.7  | 1.1  | 10.6  | 13     | 1.01 |
| 233 | Strawberries, frozen                 | 821005 | 0.2  | 0.3  | 10.9  | 11.8   | 1    |
| 234 | Sour cherries without stones, frozen | 821006 | 0    | 0.2  | 11    | 11.3   | 1.01 |
| 235 | Fruit-mix, frozen                    | 822001 | 0.2  | 0.3  | 10.9  | 11.8   | 1    |
| 236 | Banans, dried                        | 831001 | 7.03 | 5.86 | 42.97 | 55.86  | 1    |
| 237 | Dates, dried                         | 831002 | 5.43 | 8.53 | 82.17 | 100.76 | 1    |
| 238 | Figs, dried                          | 831003 | 5.43 | 8.53 | 82.17 | 100.76 | 1    |
| 239 | Apples, dried                        | 831004 | 0.76 | 2.73 | 98.48 | 101.97 | 1    |

|     |                                                  |         |      |      |       |        |   |
|-----|--------------------------------------------------|---------|------|------|-------|--------|---|
| 240 | Apricots, dried                                  | 831005  | 2.94 | 8.82 | 85.29 | 98.53  | 1 |
| 241 | Raisins, dried                                   | 831006  | 1.07 | 6.42 | 65.78 | 79.14  | 1 |
| 242 | Plums with stones, dried                         | 831007  | 5.43 | 8.53 | 82.17 | 100.76 | 1 |
| 243 | Pineapple jam, low-sugar                         | 841001  | 0    | 0    | 0     | 12     | 1 |
| 244 | Peach jam, low-sugar                             | 841002  | 0    | 0    | 0     | 12     | 1 |
| 245 | Blackcurrants jam, low-sugar                     | 841003  | 0    | 0    | 0     | 12     | 1 |
| 246 | Blackcurrants jam, high-sugar                    | 841004  | 0    | 0    | 0     | 12     | 1 |
| 247 | Bilberries jam, low-sugar                        | 841005  | 0    | 0    | 0     | 12     | 1 |
| 248 | Apricot jam, low-sugar                           | 841007  | 0    | 0    | 0     | 12     | 1 |
| 249 | Orange jam, low-sugar                            | 841008  | 0    | 0    | 0     | 12     | 1 |
| 250 | Plums jam, low-sugar                             | 841009  | 0    | 0    | 0     | 12     | 1 |
| 251 | Plums jam, high-sugar                            | 841010  | 0    | 0    | 0     | 12     | 1 |
| 252 | Strawberries jam, low-sugar                      | 841011  | 0    | 0    | 0     | 12     | 1 |
| 253 | Strawberries jam, high-sugar                     | 841012  | 0    | 0    | 0     | 12     | 1 |
| 254 | Sour cherries jam, low-sugar                     | 841013  | 0    | 0    | 0     | 12     | 1 |
| 255 | Sour cherries jam, high-sugar                    | 841014  | 0    | 0    | 0     | 12     | 1 |
| 256 | Plums jam, "Powidla śliwkowe"                    | 841015  | 0    | 0    | 0     | 12     | 1 |
| 257 | Strawberries jam, low-sugar, fortified vitamin C | 841016  | 0    | 0    | 0     | 12     | 1 |
| 258 | Pineapple in sirup, canned                       | 842001  | 0.44 | 3.8  | 11    | 17     | 1 |
| 259 | Olives green, in brine, canned                   | 842002  | 0.29 | 1.1  | 34    | 35.39  | 1 |
| 260 | Peach in sirup, canned                           | 842003  | 1.8  | 0.58 | 13    | 15.38  | 1 |
| 261 | Strawberries sirup                               | 842004  | 0    | 0    | 0     | 12     | 1 |
| 262 | Almonds, sweet                                   | 911001  | 3    | 9    | 118   | 130    | 1 |
| 263 | Peanuts                                          | 911002  | 13   | 15   | 76    | 116    | 1 |
| 264 | Coconut                                          | 911003  | 15   | 5    | 33    | 53     | 1 |
| 265 | Hazelnuts                                        | 911005  | 1    | 7    | 108   | 116    | 1 |
| 266 | Pistachio nuts, dried                            | 911006  | 5    | 10   | 198   | 214    | 1 |
| 267 | Walnuts                                          | 911007  | 0    | 5    | 87    | 92     | 1 |
| 268 | Poppy seeds, dried                               | 1011001 | 7    | 29   | 109   | 145    | 1 |
| 269 | Sesame seeds                                     | 1011002 | 22   | 53   | 232   | 714    | 1 |
| 270 | Sunflower seeds                                  | 1011003 | 15.8 | 20.9 | 140.4 | 222.5  | 1 |
| 271 | Pumpkin seeds                                    | 1011004 | 0    | 3    | 13    | 16     | 1 |
| 272 | Linen seeds                                      | 1011005 | 11   | 45   | 90    | 213    | 1 |
| 273 | Cocoa, powder                                    | 1131001 | 31.4 | 12.3 | 77.6  | 126    | 1 |
| 274 | Cocoa drink, powder, fortified vitamins          | 1131002 | 31.4 | 12.3 | 77.6  | 126    | 1 |



|     |                                                      |         |      |     |      |       |   |
|-----|------------------------------------------------------|---------|------|-----|------|-------|---|
| 275 | "Bounty Milk", bar                                   | 1141001 | 23   | 10  | 56   | 94    | 1 |
| 276 | "Mars", bar                                          | 1141002 | 23   | 10  | 56   | 94    | 1 |
| 277 | "Milky Way", bar                                     | 1141003 | 23   | 10  | 56   | 94    | 1 |
| 278 | "Snickers", bar                                      | 1141004 | 23   | 10  | 56   | 94    | 1 |
| 279 | "Twix", bar                                          | 1141005 | 23   | 10  | 56   | 94    | 1 |
| 280 | Chocolate, plain                                     | 1141006 | 23   | 10  | 56   | 94    | 1 |
| 281 | Chocolate, bitter                                    | 1141007 | 31   | 12  | 86   | 129   | 1 |
| 282 | Chocolate, milk                                      | 1141009 | 23   | 10  | 56   | 94    | 1 |
| 283 | Chocolate, milk with hazelnuts                       | 1141010 | 23   | 10  | 56   | 94    | 1 |
| 284 | Chocolate, filled                                    | 1141011 | 23   | 10  | 56   | 94    | 1 |
| 285 | Chocolate, cream with hazelnuts                      | 1141012 | 23   | 10  | 56   | 94    | 1 |
| 286 | Chocolate, white                                     | 1141013 | 23   | 10  | 56   | 94    | 1 |
| 287 | Sponge cakes with fruit jam, chocolate-coated        | 1151001 | 4.3  | 13  | 34   | 55    | 1 |
| 288 | Biscuits                                             | 1151002 | 4.3  | 13  | 34   | 55    | 1 |
| 289 | Biscuits "Corso"                                     | 1151003 | 4.3  | 13  | 34   | 55    | 1 |
| 290 | Biscuits sugar-coated                                | 1151004 | 4.3  | 13  | 34   | 55    | 1 |
| 291 | Biscuits with chocolate                              | 1151005 | 4.3  | 13  | 34   | 55    | 1 |
| 292 | Biscuits, chocolate-coated                           | 1151006 | 4.3  | 13  | 34   | 55    | 1 |
| 293 | Biscuits with peanuts, chocolate-coated              | 1151007 | 4.3  | 13  | 34   | 55    | 1 |
| 294 | Biscuits with cocoa                                  | 1151008 | 4.3  | 13  | 34   | 55    | 1 |
| 295 | Biscuits with coconut                                | 1151009 | 4.3  | 13  | 34   | 55    | 1 |
| 296 | Biscuits with chocolate filling                      | 1151010 | 4.3  | 13  | 34   | 55    | 1 |
| 297 | Biscuits with fruit jam filling                      | 1151011 | 4.3  | 13  | 34   | 55    | 1 |
| 298 | Biscuits with sesame seeds                           | 1151012 | 6.07 | 17  | 53.8 | 120.9 | 1 |
| 299 | Biscuits with milk filling                           | 1151013 | 4.3  | 13  | 34   | 55    | 1 |
| 300 | Sticks with caraway seeds                            | 1151014 | 4.3  | 13  | 34   | 55    | 1 |
| 301 | Gingerbread with fruit jam filling, chocolate-coated | 1151015 | 5.9  | 19  | 41   | 71    | 1 |
| 302 | Gingerbread with fruit jam filling, glazed           | 1151016 | 5.9  | 19  | 41   | 71    | 1 |
| 303 | Sticks slated                                        | 1151017 | 2    | 8.2 | 23   | 36    | 1 |
| 304 | Wafers with filling                                  | 1151018 | 4    | 7.2 | 26   | 44    | 1 |
| 305 | Wafers with filling, chocolate-coated                | 1151019 | 4    | 7.2 | 26   | 44    | 1 |
| 306 | Cakes "Sezamki" with sesame seeds                    | 1151020 | 22   | 53  | 232  | 714   | 1 |
| 307 | Halva with vanilla                                   | 1152001 | 22   | 53  | 232  | 714   | 1 |
| 308 | Halva with cocoa                                     | 1152002 | 22   | 53  | 232  | 714   | 1 |
| 309 | Sponge cakes with fruit jam, chocolate-coated        | 1161001 | 0    | 9.4 | 20   | 29.4  | 1 |

|     |                                        |         |        |        |      |        |   |
|-----|----------------------------------------|---------|--------|--------|------|--------|---|
| 310 | Rolls yeast with apples                | 1161002 | 0.5    | 6.5    | 16.4 | 26.5   | 1 |
| 311 | Yeast cake                             | 1161003 | 0.5    | 6.5    | 16.4 | 26.5   | 1 |
| 312 | Short-cake                             | 1161004 | 2.6    | 20     | 36   | 61     | 1 |
| 313 | Puff-pastry cakes with plums           | 1161005 | 2.6    | 20     | 36   | 61     | 1 |
| 314 | Cakes "Karpotka"                       | 1161006 | 0      | 9.4    | 20   | 29.4   | 1 |
| 315 | Cakes "Napoleonka"                     | 1161007 | 0      | 9.4    | 20   | 29.4   | 1 |
| 316 | Layer cakes with fresh fruit           | 1161008 | 0      | 9.4    | 20   | 29.4   | 1 |
| 317 | Eclairs                                | 1161009 | 0      | 9.4    | 20   | 29.4   | 1 |
| 318 | Cakes yeast with bilberries            | 1161010 | 0.5    | 6.5    | 16.4 | 26.5   | 1 |
| 319 | Cake with dried fruits mixed           | 1161011 | 5.9    | 19     | 41   | 71     | 1 |
| 320 | Gingerbread with dried fruits mixed    | 1161012 | 5.9    | 19     | 41   | 71     | 1 |
| 321 | Yeast cake with crust pastry           | 1161013 | 2.7    | 6.6    | 19   | 30     | 1 |
| 322 | Cream puffs                            | 1161014 | 0      | 9.4    | 20   | 29.4   | 1 |
| 323 | Rolled dough with poppy seeds          | 1161015 | 2.7    | 6.6    | 19   | 30     | 1 |
| 324 | Puff-pastry crescent with apple        | 1161016 | 2.6    | 20     | 36   | 61     | 1 |
| 325 | Layer cake with pineapple              | 1161021 | 0      | 9.4    | 20   | 29.4   | 1 |
| 326 | Cakes with cream                       | 1161022 | 2.6    | 20     | 36   | 61     | 1 |
| 327 | Yeast cake "Luksusowa"                 | 1161023 | 1.7    | 16.9   | 21.3 | 44.4   | 1 |
| 328 | Roll yeast with apple and crust pastry | 1161025 | 2      | 6      | 18   | 27     | 1 |
| 329 | Yeast cake with strawberries           | 1161026 | 2.7    | 6.6    | 19   | 30     | 1 |
| 330 | Cake "Ponczowe" with cream             | 1161027 | 2.6    | 20     | 36   | 61     | 1 |
| 331 | Chrust                                 | 1161028 | 2.6    | 20     | 36   | 61     | 1 |
| 332 | Cake from fresh apples                 | 1161029 | 2      | 6      | 18   | 27     | 1 |
| 333 | Cake puff "Groszek ptysiowy"           | 1161031 | 2.3    | 7.8    | 18.7 | 32.9   | 1 |
| 334 | Doughnut                               | 1161032 | 0.5    | 6.5    | 16.4 | 26.5   | 1 |
| 335 | Layer cake "Wuzetka"                   | 1161035 | 0      | 9.4    | 20   | 29.4   | 1 |
| 336 | Tea, infusion without sugar            | 1211001 | 0.0011 | 0.0092 | 0.08 | 0.0903 | 1 |
| 337 | Coffee, infusion, without sugar        | 1211002 | 3.45   | 1.755  | 5.53 | 10.735 | 1 |
| 338 | Pineapple juice                        | 1212001 | 0.023  | 0.071  | 0.42 | 0.514  | 1 |
| 339 | Lemon juice                            | 1212003 | 0.023  | 0.071  | 0.42 | 0.514  | 1 |
| 340 | Grapefruit juice                       | 1212004 | 0.023  | 0.071  | 0.42 | 0.514  | 1 |
| 341 | Apple juice                            | 1212005 | 0.0026 | 0.027  | 0.21 | 0.2396 | 1 |
| 342 | Carrot juice                           | 1212006 | 1.27   | 0.677  | 2.7  | 4.647  | 1 |
| 343 | Carrot and peach juice                 | 1212007 | 0.224  | 0.607  | 2.5  | 3.331  | 1 |
| 344 | Carrot and apple juice                 | 1212008 | 0.224  | 0.607  | 2.5  | 3.331  | 1 |

|     |                                                           |         |        |        |       |        |   |
|-----|-----------------------------------------------------------|---------|--------|--------|-------|--------|---|
| 345 | Carrot and apple and orange juice                         | 1212009 | 0.224  | 0.607  | 2.5   | 3.331  | 1 |
| 346 | Carrot and orange juice                                   | 1212010 | 0.224  | 0.607  | 2.5   | 3.331  | 1 |
| 347 | Carrot, apple and tropical fruits juice                   | 1212011 | 0.224  | 0.607  | 2.5   | 3.331  | 1 |
| 348 | Orange juice                                              | 1212012 | 0.023  | 0.071  | 0.42  | 0.514  | 1 |
| 349 | Tomato juice                                              | 1212013 | 0.331  | 0.155  | 0.36  | 0.846  | 1 |
| 350 | Vegetable juice                                           | 1212014 | 0.596  | 0.242  | 0.74  | 1.578  | 1 |
| 351 | Carrot and banana and apple juice                         | 1212015 | 0.224  | 0.607  | 2.5   | 3.331  | 1 |
| 352 | Carrot, peach and apple juice                             | 1212016 | 0.224  | 0.607  | 2.5   | 3.331  | 1 |
| 353 | Carrot, apricot and apple juice                           | 1212017 | 0.224  | 0.607  | 2.5   | 3.331  | 1 |
| 354 | Apple and mango juice                                     | 1212019 | 0.0026 | 0.027  | 0.21  | 0.2396 | 1 |
| 355 | Grapefruit juice with aspartame                           | 1212020 | 0.023  | 0.071  | 0.42  | 0.514  | 1 |
| 356 | Orange and grapefruit juice                               | 1212022 | 0.03   | 0.139  | 2.1   | 2.269  | 1 |
| 357 | Multifruit juice from polish fruits                       | 1212023 | 0.0026 | 0.027  | 0.21  | 0.2396 | 1 |
| 358 | Peach and orange juice                                    | 1212026 | 0.023  | 0.071  | 0.42  | 0.514  | 1 |
| 359 | Grape white juice                                         | 1212027 | 0.023  | 0.071  | 0.42  | 0.514  | 1 |
| 360 | Beetroot juice "Barszczyk czerwony"                       | 1212028 | 0.04   | 0.047  | 0.42  | 0.507  | 1 |
| 361 | Multifruit juice from tropical fruits                     | 1212029 | 0.023  | 0.071  | 0.42  | 0.514  | 1 |
| 362 | Coca Cola, Pepsi Cola                                     | 1213001 | 0.0013 | 0.008  | 0.05  | 0.0593 | 1 |
| 363 | Fruit juice drink, carbonated ready to drink              | 1213002 | 0.0008 | 0.0058 | 0.06  | 0.0666 | 1 |
| 364 | Lemonade                                                  | 1213003 | 0.019  | 0.073  | 0.48  | 0.572  | 1 |
| 365 | Apple drink                                               | 1213004 | 0.0026 | 0.027  | 0.21  | 0.2396 | 1 |
| 366 | Apple and sour cherry drink                               | 1213005 | 0.0026 | 0.027  | 0.21  | 0.2396 | 1 |
| 367 | Apple and grape red drink                                 | 1213006 | 0.0026 | 0.027  | 0.21  | 0.2396 | 1 |
| 368 | Apple and mentha drink                                    | 1213007 | 0.0026 | 0.027  | 0.21  | 0.2396 | 1 |
| 369 | Orange drink                                              | 1213008 | 0.023  | 0.071  | 0.42  | 0.514  | 1 |
| 370 | Grape white drink                                         | 1213009 | 0.023  | 0.071  | 0.42  | 0.514  | 1 |
| 371 | Pineapple nectar                                          | 1214001 | 0.023  | 0.071  | 0.42  | 0.514  | 1 |
| 372 | Peach nectar                                              | 1214002 | 0.023  | 0.071  | 0.42  | 0.514  | 1 |
| 373 | Blackcurrant nectar                                       | 1214003 | 0.023  | 0.071  | 0.42  | 0.514  | 1 |
| 374 | Sour cherry nectar                                        | 1214006 | 0.023  | 0.071  | 0.42  | 0.514  | 1 |
| 375 | Carrot, banana and apple juice, fortified vitamin E nad C | 1215001 | 0.224  | 0.607  | 2.5   | 3.331  | 1 |
| 376 | Multifruit juice from exotic fruits, fortified vitamins   | 1215009 | 0.023  | 0.071  | 0.42  | 0.514  | 1 |
| 377 | Blackcurrant nectar, fortified vitamins                   | 1217003 | 0.03   | 0.139  | 2.1   | 2.269  | 1 |
| 378 | Sour cheery nectar, fortified vitamins                    | 1217006 | 0.03   | 0.139  | 2.1   | 2.269  | 1 |
| 379 | Beer                                                      | 1221001 | 0.005  | 0.0293 | 0.235 | 0.2693 | 1 |

|     |                                           |         |      |      |       |       |      |
|-----|-------------------------------------------|---------|------|------|-------|-------|------|
| 380 | Champagne                                 | 1221002 | 0    | 0    | 0.094 | 0.094 | 1    |
| 381 | Vermouth, sweet                           | 1221003 | 0    | 0    | 0.094 | 0.094 | 1    |
| 382 | Wine, white, medium                       | 1221004 | 0    | 0    | 0.094 | 0.094 | 1    |
| 383 | Wine white sweet                          | 1221005 | 0    | 0    | 0.094 | 0.094 | 1    |
| 384 | Wine, white, dry                          | 1221006 | 0    | 0    | 0.094 | 0.094 | 1    |
| 385 | Wine, red                                 | 1221007 | 0    | 0    | 0.094 | 0.094 | 1    |
| 386 | Potato crisps, bacon flavour              | 1411001 | 14   | 15   | 45    | 88    | 1    |
| 387 | Potato crisps with paprika                | 1411002 | 14   | 15   | 45    | 88    | 1    |
| 388 | Potato crisps, salted                     | 1411003 | 14   | 15   | 45    | 88    | 1    |
| 389 | Mayonnaise, home-made, from repeseed oil  | 1421002 | 24   | 181  | 251   | 484   | 1    |
| 390 | Mayonnaise, home-made, from sunflower oil | 1421003 | 24   | 181  | 251   | 484   | 1    |
| 391 | Mustard                                   | 1421004 | 2.5  | 26.5 | 74.4  | 103.4 | 1    |
| 392 | Soya beans goulash                        | 2091901 | 8.15 | 2.55 | 32.49 | 80.5  | 0.54 |
| 393 | Soya beans, cutletes                      | 2091902 | 8.15 | 2.55 | 32.49 | 80.5  | 0.54 |
| 394 | Soya beans, cutletes (without eggs)       | 2091903 | 8.15 | 2.55 | 32.49 | 80.5  | 0.54 |
| 395 | Soya beans paste with tomato paste        | 2091904 | 8.15 | 2.55 | 32.49 | 80.5  | 1    |
| 396 | Soya beans, paste, pâté                   | 2091905 | 8.15 | 2.55 | 32.49 | 80.5  | 1    |
| 397 | Soya beans, boiled                        | 2091906 | 8.15 | 2.55 | 32.49 | 80.5  | 0.54 |

\*) Database compatible with "Tables of composition and nutritional value of food" - Poland, 2011
