# Supplementary material for: Assessment of Plant Sterols in the Diet of Adult Polish Population with the Use of a Newly Developed Database
Source: MDPI journal article supplement (doi:10.3390/nu13082722), 2021-08-07
Supplement: s1 [file s1]

**Table S2: Content of selected plant sterols (stigmasterol, campesterol, beta-sitosterol) and total plant sterols in dishes (mg/100g of dish) <sup>1)</sup>.**

| No. | Dishes                                          | Code    | Stigmasterol<br>mg/100g | Campesterol<br>mg/100g | Beta-sitosterol<br>mg/100g | Plant sterols,<br>total<br>mg/100g |
|-----|-------------------------------------------------|---------|-------------------------|------------------------|----------------------------|------------------------------------|
| 1   | Soup, beetroot, creamed                         | 2011001 | 0.8523                  | 0.1618                 | 1.5838                     | 2.873                              |
| 2   | Soup, beetroot and vegetables with string-beans | 2011002 | 3.0599                  | 1.0656                 | 5.718                      | 10.3622                            |
| 3   | Soup, beetroot and vegetables with white beans  | 2011003 | 3.2998                  | 2.2113                 | 9.3369                     | 15.0308                            |
| 4   | Soup, beet greens                               | 2011004 | 0.2073                  | 0.0659                 | 0.4894                     | 2.086                              |
| 5   | Soup, sauerkraut                                | 2011005 | 0.011                   | 0.2614                 | 0.8438                     | 1.1842                             |
| 6   | Soup, cabbage                                   | 2011006 | 0.8287                  | 1.2379                 | 4.7582                     | 6.9763                             |
| 7   | Soup, cream of green pea                        | 2011007 | 1.107                   | 1.6234                 | 11.6661                    | 15.1887                            |
| 8   | Soup, "Krupnik" with buckwheat groats           | 2011008 | 0.9767                  | 1.2166                 | 6.2515                     | 8.6067                             |
| 9   | Soup, "Krupnik" with pearl barley groats        | 2011009 | 0.9371                  | 0.9686                 | 4.3915                     | 6.5012                             |
| 10  | Soup, "Krupnik" with rice                       | 2011011 | 0.9619                  | 0.9885                 | 4.4486                     | 6.593                              |
| 11  | Soup, onion                                     | 2011012 | 0.7929                  | 2.0985                 | 7.348                      | 10.3785                            |
| 12  | Soup, lemon with rice                           | 2011013 | 1.6134                  | 2.7246                 | 10.4488                    | 14.9532                            |
| 13  | Soup, white bean                                | 2011014 | 7.9156                  | 1.4357                 | 7.9424                     | 17.3179                            |
| 14  | Soup, yellow pea                                | 2011015 | 2.2464                  | 3.145                  | 23.2502                    | 30.1579                            |
| 15  | Soup, mushroom, creamed                         | 2011016 | 0.0085                  | 0.229                  | 0.2044                     | 0.4662                             |
| 16  | Soup, vegetable                                 | 2011017 | 3.4781                  | 1.4368                 | 6.7829                     | 11.8191                            |
| 17  | Soup, vegetable, creamed                        | 2011018 | 1.5622                  | 1.6143                 | 6.3016                     | 9.7007                             |
| 18  | Soup, cauliflower                               | 2011019 | 1.2014                  | 1.946                  | 6.0937                     | 9.5225                             |
| 19  | Soup, dill-pickled cucumber                     | 2011021 | 0.7188                  | 0.8549                 | 3.7856                     | 5.5186                             |
| 20  | Soup, apple                                     | 2011022 | 0.0434                  | 0.1563                 | 5.6459                     | 5.8457                             |
| 21  | Soup, tomato                                    | 2011023 | 0.8262                  | 0.2038                 | 1.4325                     | 2.5903                             |
| 22  | Soup, tomato with pasta                         | 2011024 | 0.6135                  | 0.841                  | 3.3144                     | 4.8412                             |
| 23  | Soup, tomato with rice                          | 2011025 | 0.6507                  | 0.8745                 | 3.4688                     | 5.0904                             |
| 24  | Soup, tomato, creamed                           | 2011026 | 0.8262                  | 0.2038                 | 1.4325                     | 2.5903                             |
| 25  | Soup, celeriac                                  | 2011028 | 1.4223                  | 1.1422                 | 4.3216                     | 6.9814                             |
| 26  | Soup, celeriac with croutons                    | 2011029 | 2.8049                  | 3.3038                 | 11.2227                    | 18.6273                            |
| 27  | Soup, sorrel                                    | 2011030 | 0.705                   | 1.5806                 | 5.7604                     | 8.0943                             |
| 28  | Soup, spinach with potatoes                     | 2011031 | 0.8779                  | 0.3385                 | 2.2867                     | 3.8928                             |
| 29  | Soup, string bean                               | 2011032 | 5.144                   | 1.057                  | 6.3691                     | 12.8034                            |
| 30  | Soup, leek with pasta                           | 2011033 | 1.1271                  | 1.0881                 | 5.0662                     | 7.3729                             |

|    |                                                   |         |        |         |         |          |
|----|---------------------------------------------------|---------|--------|---------|---------|----------|
| 31 | Soup, green pea                                   | 2011034 | 1.9077 | 2.2214  | 13.3625 | 18.2084  |
| 32 | Soup, potato                                      | 2011035 | 0.949  | 0.966   | 4.5036  | 6.6277   |
| 33 | Soup, potato, creamed                             | 2011036 | 0.4626 | 0.857   | 3.6627  | 5.1484   |
| 34 | Soup, "Žurek", sour rye                           | 2011037 | 0.2019 | 0.1622  | 1.4345  | 2.0589   |
| 35 | Soup, "Neapolitan" with Emmental cheese           | 2011038 | 0.7843 | 1.0725  | 4.0589  | 6.0807   |
| 36 | Soup, wheat grits with vegetable broth            | 2011039 | 0.5741 | 0.2763  | 1.3125  | 2.4416   |
| 37 | Soup, beetroot                                    | 2011901 | 1.6013 | 0.2578  | 2.7495  | 5.0226   |
| 38 | Soup, chicken with pasta                          | 2011906 | 0.4622 | 0.1922  | 1.0393  | 1.7316   |
| 39 | Soup, dill-pickled cucumber, creamed              | 2011912 | 0.7018 | 0.2373  | 1.7549  | 2.8884   |
| 40 | Soup, milk with wheat grits                       | 2012002 | 0.0397 | 0.253   | 0.863   | 1.5872   |
| 41 | Soup, milk with noodles dropped                   | 2012003 | 0.0099 | 0.1612  | 0.5208  | 0.7886   |
| 42 | Soup, milk with rolled oats                       | 2012005 | 0.0893 | 0.3069  | 1.7856  | 2.1818   |
| 43 | Soup, milk with rice                              | 2012006 | 0.0992 | 0.0893  | 0.4117  | 0.6646   |
| 44 | Cocoa with milk, powder                           | 2012901 | 1.256  | 0.492   | 3.104   | 5.04     |
| 45 | Cod fillets in vegetables, boiled                 | 2021001 | 3.9335 | 5.8367  | 22.466  | 32.4109  |
| 46 | Cod fillets with vegetables and tomatoes, braised | 2021002 | 2.0473 | 31.8535 | 47.5772 | 81.7252  |
| 47 | Cod fillets, breaded and fried                    | 2021003 | 0.5757 | 44.2418 | 64.9112 | 110.4438 |
| 48 | Carp with vegetables, galantine                   | 2021004 | 1.5407 | 0.4798  | 2.7532  | 4.9852   |
| 49 | Carp, boiled                                      | 2021005 | 1.4116 | 0.4233  | 2.3709  | 4.3472   |
| 50 | Cod chops minced, fried                           | 2021006 | 0.7164 | 51.5948 | 75.4168 | 128.9284 |
| 51 | Cod balls minced, in vegetables, boiled           | 2021007 | 0.8827 | 1.7964  | 5.3616  | 9.151    |
| 52 | Cod fillets, grilled                              | 2021008 | 0.4423 | 13.2612 | 19.5888 | 33.3571  |
| 53 | Salmon, saute, fried                              | 2021009 | 0.3719 | 39.2418 | 55.9812 | 95.74    |
| 54 | Salmon, grilled                                   | 2021010 | 0.4423 | 13.2612 | 19.5888 | 33.3571  |
| 55 | Veal, boiled in sauce                             | 2031001 | 2.4713 | 3.504   | 13.3587 | 19.5339  |
| 56 | Veal chops in sauce, braised                      | 2031002 | 0.568  | 28.71   | 43.5    | 74.538   |
| 57 | Veal cutlets, breaded and fried                   | 2031003 | 0.6094 | 42.4015 | 62.851  | 106.7428 |
| 58 | Veal, braised                                     | 2031004 | 0.3016 | 26.1326 | 37.3664 | 63.8491  |
| 59 | Veal, tripe, dressed                              | 2031901 | 0.704  | 0.2431  | 1.2626  | 2.3256   |
| 60 | Chicken minced chops, fried                       | 2032001 | 0.5386 | 21.08   | 33.01   | 56.6866  |
| 61 | Hen, gelantine                                    | 2032002 | 0.7342 | 0.2319  | 1.2943  | 2.3343   |
| 62 | Chicken with vegetables, boiled                   | 2032003 | 4.6773 | 3.9057  | 15.9145 | 24.6655  |
| 63 | Chicken, roasted                                  | 2032004 | 2.2157 | 4.5139  | 16.6349 | 23.3828  |
| 64 | Chicken, boiled with sauce                        | 2032005 | 1.0703 | 0.536   | 2.6993  | 4.522    |
| 65 | Chicken fillets, saute, fried                     | 2032006 | 0.0124 | 0.2015  | 0.651   | 0.9858   |

|     |                                                           |         |         |         |         |          |
|-----|-----------------------------------------------------------|---------|---------|---------|---------|----------|
| 66  | Chicken fillets, breaded, fried                           | 2032007 | 0.132   | 1.76    | 3.85    | 6.16     |
| 67  | Turkey cutlets, fried                                     | 2032008 | 0.0124  | 0.2015  | 0.651   | 0.9858   |
| 68  | Pork steaks, braised                                      | 2033001 | 1.0599  | 2.4112  | 8.7708  | 12.3386  |
| 69  | Pork steaks with vegetables, braised                      | 2033002 | 2.1384  | 2.8141  | 10.6079 | 15.7027  |
| 70  | Pig's knuckles, gelantine                                 | 2033003 | 0.5117  | 0.1715  | 0.9144  | 1.6419   |
| 71  | Pork cutlets, breaded and fried                           | 2033004 | 0.6044  | 46.9224 | 68.8516 | 117.1419 |
| 72  | Pork, braised                                             | 2033006 | 0.1517  | 13.0838 | 18.9012 | 32.1614  |
| 73  | Pork roll, roasted                                        | 2033007 | 0.342   | 2.09    | 5.7     | 10.26    |
| 74  | Pork loin, roasted                                        | 2033009 | 0.1583  | 13.0565 | 18.8823 | 32.0978  |
| 75  | Pork steaks, fried                                        | 2033010 | 0.249   | 26.0893 | 37.1346 | 63.5214  |
| 76  | Pig's liver, saute, fried                                 | 2033011 | 0.3034  | 26.1675 | 37.8024 | 64.3227  |
| 77  | Pork, boiled                                              | 2033012 | 1.7855  | 0.6007  | 3.5366  | 6.1322   |
| 78  | Pork ribs, braised                                        | 2033013 | 0.1567  | 13.1644 | 19.1616 | 32.5557  |
| 79  | Pork, knuckle, boiled                                     | 2033901 | 0.5076  | 0.168   | 0.9015  | 1.6236   |
| 80  | Pork ribs, braised                                        | 2033909 | 0.0364  | 0.1442  | 0.6965  | 0.9381   |
| 81  | Beef steaks, chopped, fried                               | 2034001 | 0.2084  | 18.2968 | 26.3725 | 44.9025  |
| 82  | Beef steaks, braised                                      | 2034002 | 1.0599  | 2.4112  | 8.7708  | 12.3386  |
| 83  | Beef steaks with vegetables, braised                      | 2034003 | 3.3627  | 3.2501  | 13.6506 | 20.6268  |
| 84  | Beef Stroganoff, braised                                  | 2034004 | 0.3155  | 21.0187 | 30.4518 | 51.8992  |
| 85  | Beef filled, fried                                        | 2034005 | 0.243   | 26.0806 | 37.0604 | 63.4323  |
| 86  | Beef goulash, braised                                     | 2034006 | 0.4089  | 21.0219 | 30.6403 | 52.1738  |
| 87  | Beef filled, roasted                                      | 2034007 | 3.15    | 6.75    | 24.75   | 34.65    |
| 88  | Beef, braised                                             | 2034008 | 0.2129  | 20.9426 | 30.0161 | 51.2445  |
| 89  | Beef, boiled                                              | 2034010 | 1.2446  | 0.6694  | 3.3036  | 5.3892   |
| 90  | Beef roulade with pork fat, braised                       | 2034011 | 0.0401  | 0.2047  | 0.8918  | 1.2338   |
| 91  | Beef and pork minced chops, braised                       | 2035001 | 0.587   | 23.2363 | 36.3878 | 62.5724  |
| 92  | Beef and pork minced cutlets, fried                       | 2035002 | 0.5498  | 33.3948 | 49.6568 | 84.8018  |
| 93  | Pate from mixed meat, baked                               | 2035003 | 0.2253  | 1.1652  | 3.5565  | 6.0678   |
| 94  | Beef and pork minced, roasted                             | 2035004 | 1.76    | 5.72    | 17.9    | 27.4     |
| 95  | Beef and pork minced balls, boiled                        | 2035005 | 1.6581  | 2.7428  | 8.8447  | 15.7471  |
| 96  | Sauerkraut with sausage and meat, "Bigos", stewed         | 2041001 | 0.8911  | 7.6702  | 16.3068 | 25.12    |
| 97  | Beans baked with meat in tomato sauce                     | 2041002 | 13.5685 | 5.8833  | 25.72   | 45.2282  |
| 98  | Cabbage leaves stuffed with meat and rice in tomato sauce | 2041003 | 0.5756  | 3.788   | 8.1872  | 12.8939  |
| 99  | Pepper bell stuffed with meat and rice                    | 2041004 | 0.681   | 2.8807  | 11.7436 | 16.2178  |
| 100 | Risotto with meat and vegetables                          | 2041005 | 1.1932  | 0.5747  | 3.0061  | 5.0626   |

|     |                                              |         |         |         |         |         |
|-----|----------------------------------------------|---------|---------|---------|---------|---------|
| 101 | Cucumbers sliced in sour cream               | 2051001 | 3.19    | 0.22    | 4.18    | 8.03    |
| 102 | Lettuce with tomato, cucumber and oil, salad | 2051002 | 7.845   | 3.699   | 22.38   | 36.64   |
| 103 | Lettuce with oil, salad                      | 2051003 | 13.096  | 7.692   | 45.503  | 71.381  |
| 104 | Lettuce with sour cream, salad               | 2051004 | 7.9     | 3.3     | 16.7    | 30.9    |
| 105 | Chicory and apple, salad                     | 2051005 | 12.555  | 8.4     | 54.41   | 80.285  |
| 106 | White cabbage, salad                         | 2051006 | 2.0305  | 4.778   | 21.89   | 30.06   |
| 107 | Sauerkraut, salad                            | 2051007 | 1.8745  | 4.147   | 22.7    | 29.955  |
| 108 | Carrot, salad                                | 2051008 | 2.27    | 1.868   | 12.7    | 16.838  |
| 109 | Carrot and apple, salad                      | 2051009 | 3.61    | 2.9884  | 20.99   | 27.5884 |
| 110 | Cucumber and tomato, salad                   | 2051010 | 2.8305  | 0.353   | 4.69    | 8.275   |
| 111 | Fruit, salad                                 | 2051011 | 0.399   | 0.8712  | 15.702  | 17.2402 |
| 112 | Fruit and vegetables, salad                  | 2051012 | 8.775   | 6.2078  | 41.388  | 59.758  |
| 113 | Pepper bell, salad                           | 2051013 | 4.333   | 4.854   | 27.56   | 38.69   |
| 114 | Tomato, salad                                | 2051014 | 1.7684  | 0.3784  | 3.24    | 5.708   |
| 115 | Leek and apple, salad                        | 2051015 | 4.59    | 4.9655  | 40.325  | 51.863  |
| 116 | Radish, salad                                | 2051016 | 0       | 0.51    | 3.82    | 6.7     |
| 117 | Celeriac and apple with oil, salad           | 2051017 | 13.105  | 5.85    | 30.73   | 50.805  |
| 118 | Celeriac, apple and carrot, salad            | 2051018 | 5.324   | 2.436   | 21.08   | 28.84   |
| 119 | Shantung cabbage with oil, salad             | 2051019 | 0.2145  | 12.7936 | 27.893  | 41.1031 |
| 120 | Shantung cabbage with mayonnaise, salad      | 2051020 | 0.3359  | 23.7138 | 44.462  | 68.5992 |
| 121 | Vegetable mixed with yogurt, salad           | 2051021 | 1.4355  | 1.756   | 7.645   | 11.3275 |
| 122 | Brussels sprouts, boiled                     | 2052001 | 0.3142  | 6.336   | 25.938  | 33.156  |
| 123 | Beetroot, boiled                             | 2052002 | 5.7208  | 4.208   | 20.2156 | 31.3522 |
| 124 | Beets with apples, cooked                    | 2052003 | 5.1465  | 3.4732  | 18.5341 | 28.2914 |
| 125 | Beets, cooked with roux                      | 2052004 | 3.7163  | 0.4874  | 6.3147  | 11.6703 |
| 126 | Beets in sour cream, cooked                  | 2052005 | 3.7043  | 0.47    | 6.1663  | 11.4922 |
| 127 | Beets cooked, grated with horseradish        | 2052006 | 4.0479  | 0.5806  | 7.1036  | 12.9356 |
| 128 | Pumpkin with tomato                          | 2052007 | 4.5875  | 0.3287  | 4.4396  | 9.7774  |
| 129 | String beans, boiled with butter             | 2052008 | 13.7692 | 2.9006  | 14.6103 | 31.3941 |
| 130 | Peas, green, boiled, with butter             | 2052009 | 1.92    | 2.688   | 19.872  | 25.776  |
| 131 | Cauliflower, boiled, with butter             | 2052010 | 2.8332  | 7.662   | 20.706  | 31.92   |
| 132 | Cabbage, white, stewed, with roux            | 2052011 | 0.131   | 1.694   | 5.7668  | 7.9824  |
| 133 | Carrot and green peas, boiled                | 2052012 | 3.8029  | 5.4166  | 25.6848 | 35.4671 |
| 134 | Carrot, boiled, with roux                    | 2052014 | 1.9874  | 1.6382  | 8.0484  | 11.7223 |
| 135 | Vegetable salad, cooked, with mayonnaise     | 2052015 | 12.0714 | 6.868   | 45.0925 | 66.7512 |

|     |                                                     |         |        |         |         |         |
|-----|-----------------------------------------------------|---------|--------|---------|---------|---------|
| 136 | Green peas, salad                                   | 2052016 | 7.5413 | 7.5805  | 53.6552 | 72.1359 |
| 137 | Red cabbage, salad                                  | 2052017 | 2.5788 | 3.8556  | 23.4436 | 31.1834 |
| 138 | Spinach, boiled, with roux                          | 2052018 | 3.7919 | 1.1649  | 7.4376  | 14.4245 |
| 139 | Vegetable salad, cooked, with mayonnaise and yogurt | 2052019 | 8.2614 | 19.298  | 32.3925 | 62.9512 |
| 140 | Mushrooms, fried                                    | 2053001 | 0      | 3       | 0       | 3       |
| 141 | Potato pancakes with yeast, fried                   | 2061001 | 0.5289 | 2.0049  | 6.6836  | 11.4087 |
| 142 | Meat and pasta pudding                              | 2061002 | 0.7428 | 1.1813  | 4.3779  | 6.4966  |
| 143 | Buckwheat groats, boiled with vegetable fat         | 2061003 | 1.3448 | 4.228   | 25.588  | 31.1608 |
| 144 | Buckwheat groats, boiled with lard                  | 2061004 | 0.6448 | 2.728   | 20.088  | 23.4608 |
| 145 | Pearl barley groats, boiled, with vegetable fat     | 2061005 | 0.917  | 1.717   | 6.802   | 9.8049  |
| 146 | Pearl barley groats, boiled, with lard              | 2061006 | 0.217  | 0.217   | 1.302   | 2.1049  |
| 147 | Noodles, spoon-dropped, boiled                      | 2061007 | 0.124  | 2.015   | 6.51    | 9.858   |
| 148 | Noodles, batter, boiled                             | 2061008 | 0.0546 | 0.8866  | 2.8644  | 4.3375  |
| 149 | Dumplings with plums, boiled                        | 2061009 | 0.4409 | 1.2406  | 7.0748  | 9.555   |
| 150 | Potato dumplings, boiled                            | 2061010 | 0.3267 | 1.2065  | 5.2482  | 7.7482  |
| 151 | Potato dumplings, boiled, with butter               | 2061011 | 0.3188 | 1.2017  | 5.1923  | 7.6695  |
| 152 | Yeast cake with filling " Kulebiak"                 | 2061012 | 0.2336 | 19.2881 | 29.2754 | 49.4499 |
| 153 | Dumplings with fresh cheese and potato, boiled      | 2061013 | 0.1237 | 1.0787  | 3.4348  | 5.2195  |
| 154 | Dumplings with fresh cheese, boiled                 | 2061014 | 2.8488 | 6.723   | 24.002  | 33.8916 |
| 155 | Pasta boiled, with fresh cheese and butter          | 2061017 | 0.062  | 1.0075  | 3.255   | 4.929   |
| 156 | Pancakes filled with cabbage, fried                 | 2061018 | 0.1689 | 2.0952  | 7.1702  | 10.0774 |
| 157 | Pancakes filled with fresh cheese, fried            | 2061019 | 0.0446 | 0.7254  | 2.3436  | 3.5489  |
| 158 | Dumplings with potato filling "Ruskie", boiled      | 2061020 | 0.2138 | 1.177   | 4.5587  | 6.7916  |
| 159 | Polish dumplings with meat, boiled                  | 2061022 | 0.1247 | 6.2292  | 10.8005 | 17.7592 |
| 160 | Polish dumplings with fresh cheese, boiled          | 2061024 | 0.062  | 1.0075  | 3.255   | 4.929   |
| 161 | Polish dumplings with strawberries, boiled          | 2061025 | 0.2423 | 2.386   | 11.2205 | 15.0322 |
| 162 | Risotto with meat                                   | 2061026 | 0.7458 | 16.1799 | 24.6135 | 41.8675 |
| 163 | Rice, boiled with vegetable fat                     | 2061027 | 1.196  | 1.9464  | 7.5584  | 11.0232 |
| 164 | Rice boiled, with lard                              | 2061028 | 0.434  | 0.3906  | 1.8011  | 2.9078  |
| 165 | Rice with apples, baked                             | 2061029 | 1.0414 | 2.1091  | 14.3349 | 17.7007 |
| 166 | Potato, mashed                                      | 2061030 | 0.3671 | 0.2222  | 2.6082  | 3.6708  |
| 167 | Potato, with vegetable fat                          | 2061031 | 1.7828 | 3.2317  | 13.72   | 19.2281 |
| 168 | Potato dumplings                                    | 2061032 | 0.7099 | 0.4423  | 5.1225  | 7.1709  |
| 169 | Potato dumplings with meat                          | 2061033 | 0.6143 | 1.3158  | 6.6352  | 9.6461  |
| 170 | Potato pancakes, fried                              | 2061034 | 0.7929 | 39.483  | 59.0165 | 99.921  |

|     |                                            |         |        |         |         |         |
|-----|--------------------------------------------|---------|--------|---------|---------|---------|
| 171 | Pasta with white cabbage, baked            | 2061035 | 0.2378 | 14.3594 | 23.1439 | 38.0255 |
| 172 | Potato noodles, "Śląskie", boiled          | 2061036 | 2.0741 | 4.2178  | 16.8411 | 23.6979 |
| 173 | Potato cutlets from cooked potatoes, fried | 2061037 | 0.8057 | 35.1245 | 53.7075 | 90.5392 |
| 174 | Pasta "Łazanki", with white cabbage, baked | 2061038 | 0.1352 | 1.7553  | 5.9333  | 8.5513  |
| 175 | Pancake batter sponge-cake style, fried    | 2061039 | 0.0794 | 1.2896  | 4.1664  | 6.3091  |
| 176 | Pancake batter, fried                      | 2061040 | 0.0992 | 1.612   | 5.208   | 7.8864  |
| 177 | Rice boiled                                | 2061042 | 0.496  | 0.4464  | 2.0584  | 3.3232  |
| 178 | French fries                               | 2061902 | 1.1012 | 0.6665  | 7.8246  | 11.0124 |
| 179 | Dumplings with white cabbage and mushrooms | 2061906 | 0.6903 | 2.7916  | 8.6676  | 12.8341 |
| 180 | Yeast pancakes with apples, fried          | 2061908 | 1.8107 | 3.6117  | 15.7299 | 22.1823 |
| 181 | Potato, boiled                             | 2061909 | 0.4033 | 0.2441  | 2.8653  | 4.0326  |
| 182 | Fine pasta made with eggs "Zacierka"       | 2061910 | 0.0826 | 1.342   | 4.3357  | 6.5654  |
| 183 | Eggs, scrambled                            | 2071002 | 0.7    | 1.5     | 5.5     | 7.7     |
| 184 | Eggs, chopped cutlets, fried               | 2071003 | 2.352  | 6.56    | 21.6    | 31.86   |
| 185 | Omelette biscuit with spinach              | 2071004 | 3.0499 | 1.1979  | 6.8094  | 12.8408 |
| 186 | Omelette biscuit                           | 2071901 | 0.0496 | 0.806   | 2.604   | 3.9432  |
| 187 | Omelette, natural                          | 2071902 | 6.37   | 13.65   | 50.05   | 70.07   |
| 188 | Pears with vanilla sauce                   | 2081002 | 0      | 0.2591  | 11.514  | 11.7731 |
| 189 | Apples, baked                              | 2081003 | 0.1202 | 0.4327  | 15.6247 | 16.1776 |
| 190 | Apple pie                                  | 2081004 | 8.21   | 18.9553 | 77.1282 | 105.164 |
| 191 | Jelly starch with redcurrant               | 2081005 | 0.0303 | 0.1061  | 2.0756  | 2.2422  |
| 192 | Apple compote                              | 2081007 | 0.0566 | 0.1721  | 6.1166  | 6.3452  |
| 193 | Sour cherry compote                        | 2081008 | 0      | 0.0626  | 3.4441  | 3.538   |
| 194 | Apple sauce                                | 2081010 | 0.0636 | 0.2291  | 8.2719  | 8.5646  |
| 195 | Milk drink with strawberries               | 2081011 | 0.0929 | 0.1394  | 5.0641  | 5.4823  |
| 196 | Sponge roll with jam                       | 2081012 | 0.0347 | 0.5642  | 1.8228  | 6.2402  |
| 197 | Strawberries in sweet gelatine             | 2081013 | 0.0808 | 0.1212  | 4.4036  | 4.7672  |
| 198 | Strawberries with whipped cream            | 2081014 | 0.1232 | 0.1848  | 6.7155  | 7.27    |
| 199 | Gooseberry and strawberry compote          | 2081902 | 0.0707 | 0.0808  | 2.5149  | 2.7068  |
| 200 | Redcurrant compote                         | 2081903 | 0.101  | 0.101   | 2.828   | 3.03    |
| 201 | Apple and redcurrant compote               | 2081904 | 0.0564 | 0.1719  | 6.1109  | 6.3392  |
| 202 | Apple and plum compote                     | 2081906 | 0.1717 | 0.3313  | 6.0802  | 6.7044  |
| 203 | Plum compote                               | 2081907 | 0.3732 | 0.6055  | 5.55    | 6.8377  |
| 204 | Strawberry compote                         | 2081908 | 0.0808 | 0.1212  | 4.4036  | 4.7672  |
| 205 | Steak "Tartar"                             | 2091001 | 0.7223 | 15.8171 | 26.9658 | 43.5467 |

|     |                                     |         |         |         |         |          |
|-----|-------------------------------------|---------|---------|---------|---------|----------|
| 206 | Eggs, paste                         | 2091002 | 1.1194  | 34.208  | 49.7705 | 85.2685  |
| 207 | Eggs and fish smoked, paste         | 2091003 | 0.3487  | 34.1671 | 49.3089 | 83.868   |
| 208 | Fresh cheese and fish smoked, paste | 2091004 | 0.3094  | 33.8    | 47.84   | 81.9494  |
| 209 | Horseradish sauce                   | 2611001 | 1.5033  | 3.6461  | 13.3162 | 18.6663  |
| 210 | Greek sauce                         | 2611002 | 10.1858 | 7.3389  | 24.0381 | 42.0194  |
| 211 | Mushroom sauce                      | 2611003 | 1.8127  | 4.8973  | 15.2179 | 22.0979  |
| 212 | Meat sauce                          | 2611005 | 0.5773  | 0.4536  | 2.4432  | 3.6698   |
| 213 | Mustard sauce                       | 2611006 | 1.5624  | 4.0076  | 13.2709 | 19.1788  |
| 214 | Tomato sauce                        | 2611007 | 2.6174  | 4.1721  | 15.8614 | 22.9801  |
| 215 | Chives sauce                        | 2611008 | 2.2236  | 5.3068  | 19.1894 | 26.9395  |
| 216 | Tartare sauce                       | 2611009 | 33.12   | 36.0222 | 95.8235 | 165.0522 |

<sup>y</sup>) Database compatible with "Tables of composition and nutritional value of food" - Poland, 2011

The content of plant sterols in dishes was calculated on the basis of recipes of these dishes, efficiency, retention factor and the content of plant sterols in products included in the dishes.
